# Supplementary material for: Effects of plastic ingestion on blood chemistry, gene expression and body condition in wedge-tailed shearwaters ( Ardenna pacifica )
Source: PeerJ journal article supplement (doi:10.7717/peerj.18566), 2024-11-27
Supplement: Supp_table_1.docx [file Supp_table_1.docx]

| *Test-experiment* | Total Transcripts | Net Transcripts | Outlier Transcripts | Outlier genes | Pvalue_used |
| --- | --- | --- | --- | --- | --- |
| **PLASTIC** |  |  |  |  |  |
| All samples | 15799 | 12842 | 0 | 0 | 0.05,0.1 |
| Males | 15799 | 8824 | 4,14 | 4,14 | 0.05,0.1 |
| Females | 15799 | 12503 | 1,1 | 1,1 | 0.05,0.1 |
| **SEX** |  |  |  |  |  |
| All samples | 15799 | 12853 | 2,3 | 2,3 | 0.05,0.1 |
| Plastic | 15799 | 12177 | 1,10 |  | 0.05,0.1 |
| No plastic | 15799 | 12477 | 12,43 |  | 0.05,0.1 |
| **WEIGHT 3 factor** |  |  |  |  |  |
| All samples | 15799 | 12842 | 5,17 |  | 0.05,0.1 |
| Males (just 2 factor) | 15799 | 12048 | 1,2 |  | 0.05,0.1 |
| Females | 15799 | 12507 | 5,14 |  | 0.05,0.1 |
