# Supplementary material for: Effects of plastic ingestion on blood chemistry, gene expression and body condition in wedge-tailed shearwaters ( Ardenna pacifica )
Source: PeerJ journal article supplement (doi:10.7717/peerj.18566), 2024-11-27
Supplement: Supp_table_2.docx [file Supp_table_2.docx]

| Variable |  | Independent  Variable | Estimate | | Std. Error | | t/z-value | | p-value | Significance | | Model Type |
| --- | --- | --- | --- | --- | --- | --- | --- | --- | --- | --- | --- | --- |
| (Intercept) |  | | 5.9 | 1.1 | | 5.1 | | 0.00027 | | | *** | Logistic Linear Regression |
| BUN (mg/dL) | Body Mass | | -0.006 | 0.0019 | | -3.1 | | 1.8*10-3 | | | ** | Logistic Linear Regression |
| Creatine (mg/dL) | = | | 0.43 | 0.24 | | 1.8 | | 0.07 | | | . | Logistic Linear Regression |
| Hematocrit (%) | = | | -0.02 | 0.0054 | | -3.2 | | 1.27*10-3 | | | ** | Logistic Linear Regression |
| Potassium (mmo/L) | = | | -0.047 | 0.022 | | -2.1 | | 0.04 | | | * | Logistic Linear Regression |
| Total CO2 (mmol) | = | | 0.018 | 0.0095 | | 1.9 | | 0.06 | | | . | Logistic Linear Regression |
| Sodium (mmol) | Presence of ingested plastic | | -- | -- | | 0.47 | | 0.65 | | |  | t-test |
| Potassium(mmol) | = | | -- | -- | | -0.17 | | 0.87 | | |  | t-test |
| Chloride (mmol) | = | | -- | -- | | 1.7 | | 0.1 | | | . | t-test |
| Ionized Calcium (mmol) | = | | -- | -- | | -0.46 | | 0.65 | | |  | t-test |
| Total CO2 (mmol) | = | | -- | -- | | -2 | | 0.058 | | | . | t-test |
| Glucose (mg/dL) | = | | -- | -- | | -0.46 | | 0.65 | | |  | t-test |
| BUN (md/dL) | = | | -- | -- | | 0.43 | | 0.67 | | |  | t-test |
| Hematocrit (%) | = | | -- | -- | | -0.5 | | 0.62 | | |  | t-test |
| Hemoglobin (g/dL) | = | | -- | -- | | -0.98 | | 0.34 | | |  | t-test |
| Anion Gap (mmol) | = | | -- | -- | | -0.97 | | 0.34 | | |  | t-test |
| Creatine (md/dL) | = | | -- | -- | | -1 | | 0.34 | | |  | t-test |
| Body Mass (grams) | = | | -- | -- | | -1.8 | | 0.08 | | | . | t-test |
| Sex | | -0.78 | | 0.44 | | |  |
