# Supplementary material for: Effects of plastic ingestion on blood chemistry, gene expression and body condition in wedge-tailed shearwaters ( Ardenna pacifica )
Source: PeerJ journal article supplement (doi:10.7717/peerj.18566), 2024-11-27
Supplement: Supp_table_3.docx [file Supp_table_3.docx]

|  | **Na** | **K** | **Cl** | **iCa** | **TCO2** | **Glucose** | **BUN** | **Crea** | **Hct** | **Hb** | **AnGap** | **Weight** |
| --- | --- | --- | --- | --- | --- | --- | --- | --- | --- | --- | --- | --- |
| **Mean (+)** | 155.81 | 3.27 | 132.23 | 1.12 | 11.91 | 256 | 9.99 | 0.19 | 34.36 | 11.7 | 13.63 | 377.08 |
| **Mean (-)** | 154.85 | 3.31 | 128.64 | 1.15 | 13.86 | 261.36 | 8.49 | 0.22 | 35.21 | 1.52 | 15.71 | 407.13 |
| **SD**  **(+)** | 5.47 | 0.70 | 4.90 | 0.09 | 13.86 | 24.62 | 9.73 | 0 | 4.50 | 1.52 | 5.46 | 46.18 |
| **SD**  **(-)** | 4.58 | 0.49 | 5.58 | 0.09 | 3.09 | 33.69 | 6.83 | 0.08 | 3.75 | 0.91 | 5.15 | 41.06 |
| **T-**  **test**  P-  Value | 0.65 | 0.87 | 0.09 | 0.65 | 0.06 | 0.65 | 0.67 | 0.34 | 0.62 | 0.34 | 0.34 | 0.08 |
