# Supplementary material for: Effects of plastic ingestion on blood chemistry, gene expression and body condition in wedge-tailed shearwaters ( Ardenna pacifica )
Source: PeerJ journal article supplement (doi:10.7717/peerj.18566), 2024-11-27
Supplement: Supp_table_4.docx [file Supp_table_4.docx]

| **Sample**  **ID** | **RIN**  **Value** | **Reads (R1)** | **Phred Score** | **Multiple mapped reads** | **Uniquely mapped reads** |
| --- | --- | --- | --- | --- | --- |
| **N001** | 7.4 | 67460980 | 88.37 | 2.64 | 44.30 |
| **N002** | 7.6 | 51017260 | 89.44 | 2.70 | 47.47 |
| **N003** | 7.4 | 49562364 | 89.49 | 1.99 | 57.27 |
| **N005** | 4.8 | 52338281 | 90.15 | 1.30 | 52.66 |
| **N006** | 7.7 | 22326492 | 88.17 | 1.99 | 36.94 |
| **N007** | 7.8 | 55729798 | 90.08 | 1.97 | 56.06 |
| **N008** | 7.5 | 50463441 | 90.82 | 1.63 | 53.43 |
| **N009** | 7.1 | 48210230 | 91.01 | 1.74 | 49.76 |
| **N010** | 8.4 | 53984833 | 89.36 | 1.91 | 48.18 |
| **N011** | 7.7 | 48088492 | 90.76 | 1.79 | 61.85 |
| **N012** | 8.4 | 53873745 | 91.1 | 2.02 | 51.83 |
| **N013** | 7.3 | 53345875 | 89.9 | 1.76 | 46.53 |
| **N014** | 6.7 | 49725540 | 88.74 | 1.46 | 48.84 |
| **N015** | 8.3 | 52151649 | 90.17 | 2.06 | 55.90 |
| **N016** | 7.3 | 49150085 | 90.95 | 1.45 | 60.97 |
| **N017** | 8 | 46102975 | 90.39 | 2.15 | 50.66 |
| **N018** | 8 | 52468409 | 89.45 | 2.10 | 50.74 |
| **N019** | 6.4 | 76791806 | 89.73 | 1.60 | 58.32 |
| **N020** | 7.2 | 59018466 | 89.93 | 1.41 | 44.20 |
| **N021** | 7.3 | 73582502 | 88.43 | 1.27 | 43.15 |
| **N022** | 7.3 | 70382063 | 90.21 | 1.58 | 38.69 |
| **N023** | 6.6 | 60595422 | 88.11 | 1.40 | 48.02 |
| **N024** | 7.6 | 53573485 | 90.92 | 1.78 | 59.38 |
| **N025** | 6.1 | 49161074 | 89.73 | 1.22 | 59.58 |
| **N026** | 6.7 | 56226235 | 89.6 | 1.50 | 54.55 |
| **N027** | 7.4 | 55085988 | 90.42 | 1.86 | 51.07 |
| **N028** | 8.3 | 55548564 | 89.92 | 1.76 | 43.60 |
| **N029** | 7 | 49327165 | 90.29 | 1.49 | 63.74 |
