# Supplementary figures and images for: Effects of plastic ingestion on blood chemistry, gene expression and body condition in wedge-tailed shearwaters ( Ardenna pacifica )
Source: PeerJ journal article supplement (doi:10.7717/peerj.18566), 2024-11-27

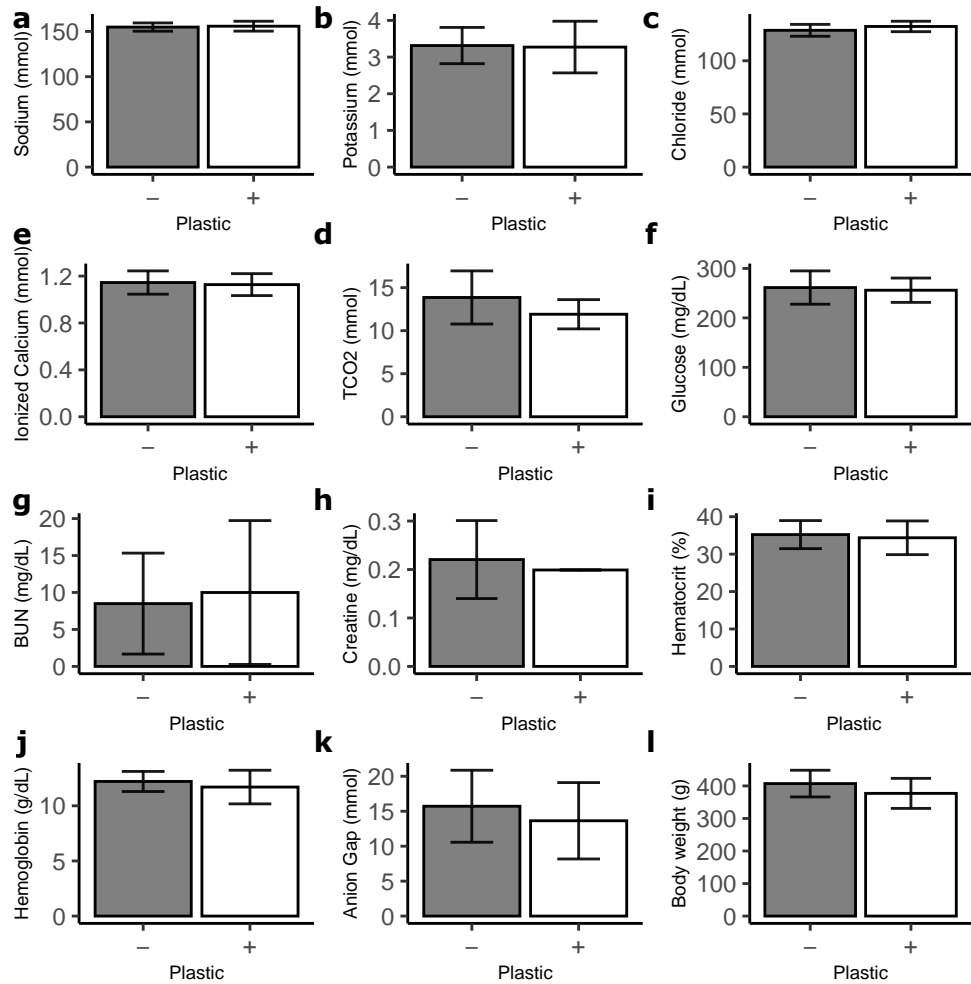

Supplement: Supp_fig_2.pdf [file Supp_fig_2.pdf]

**A** ● neg ● pos groups ● neg ● pos

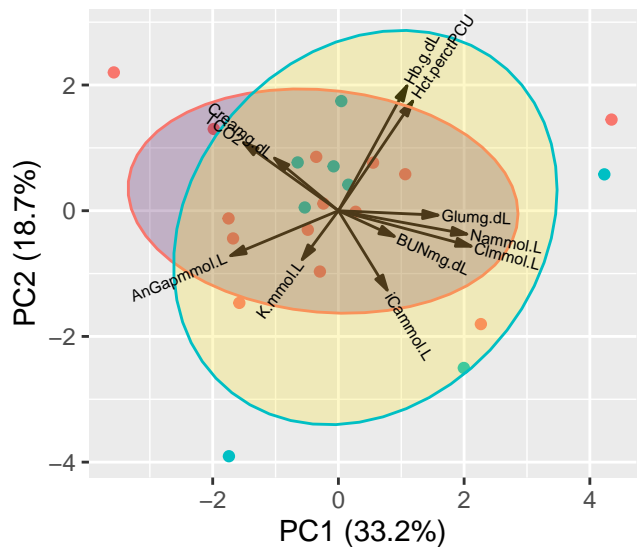

**B** ● neg ● pos groups ● neg ● pos

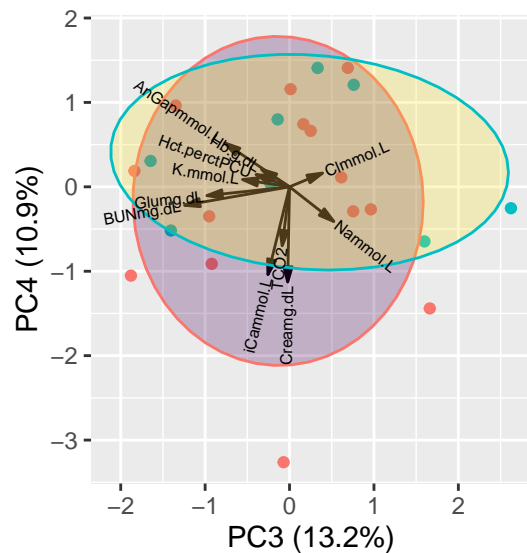

**C** ● F ● M groups ● F ● M

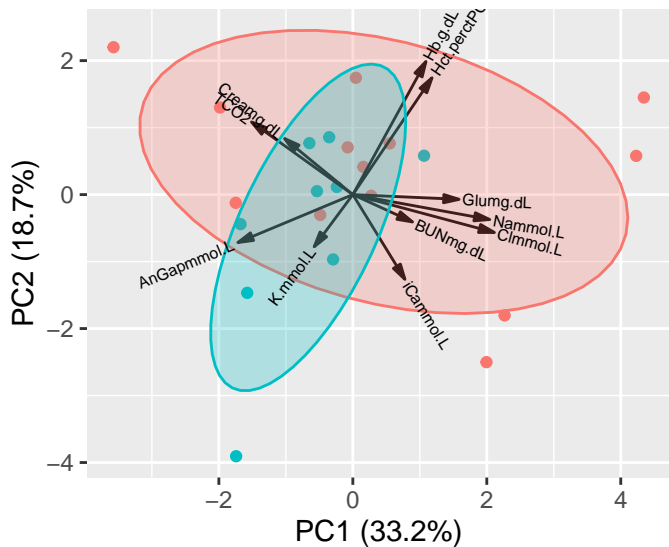

**D** ● F ● M groups ● F ● M

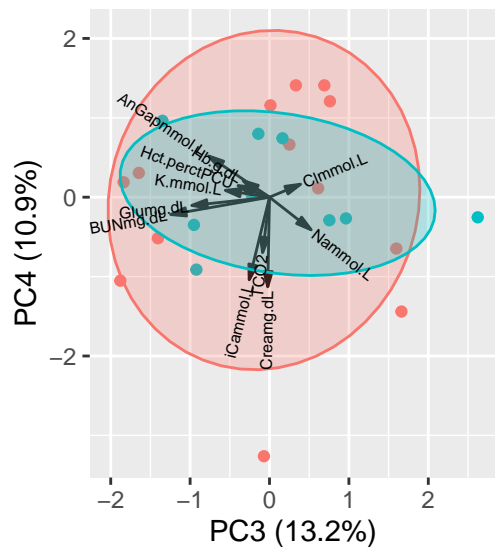

Supplement: Supp_fig_4.pdf [file Supp_fig_4.pdf]

**A** ● neg ● pos groups ■ neg ■ pos

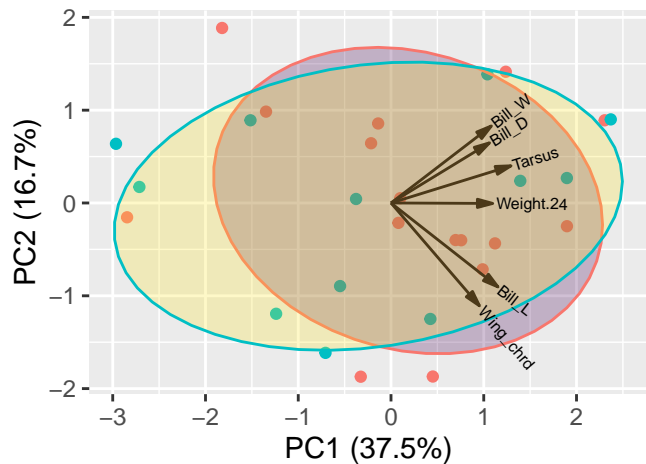

**B** ● neg ● pos groups ■ neg ■ pos

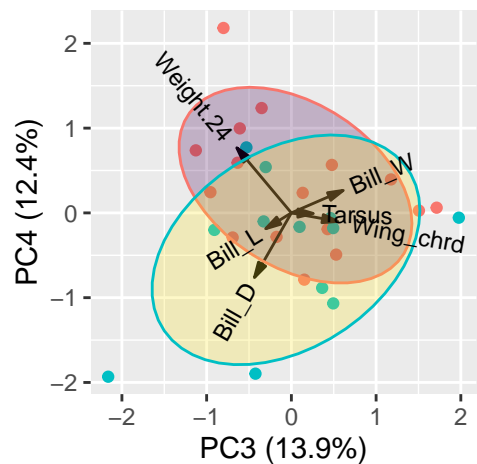

**C** ● F ● M groups ■ F ■ M

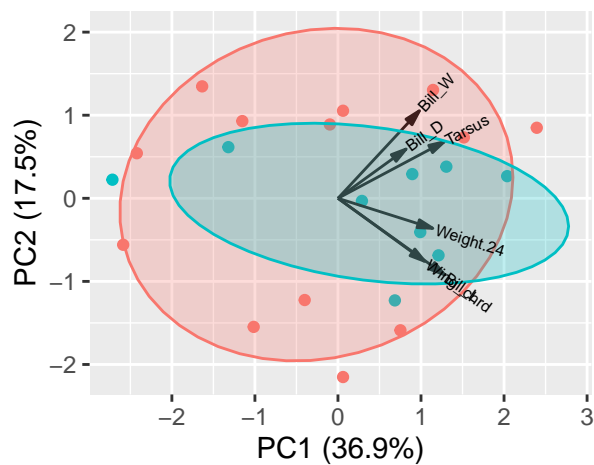

**D** ● F ● M groups ■ F ■ M

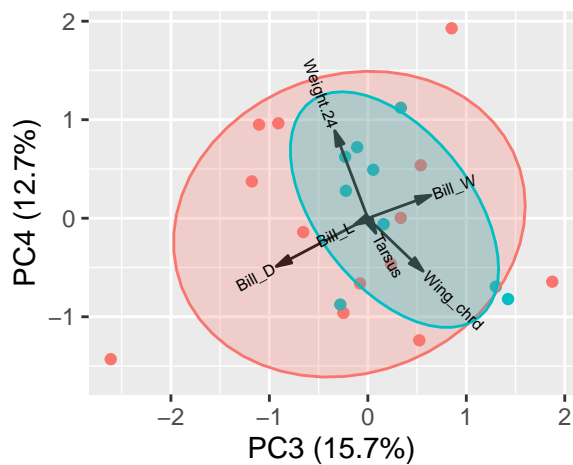

Supplement: Supp_fig_5.pdf [file Supp_fig_5.pdf]

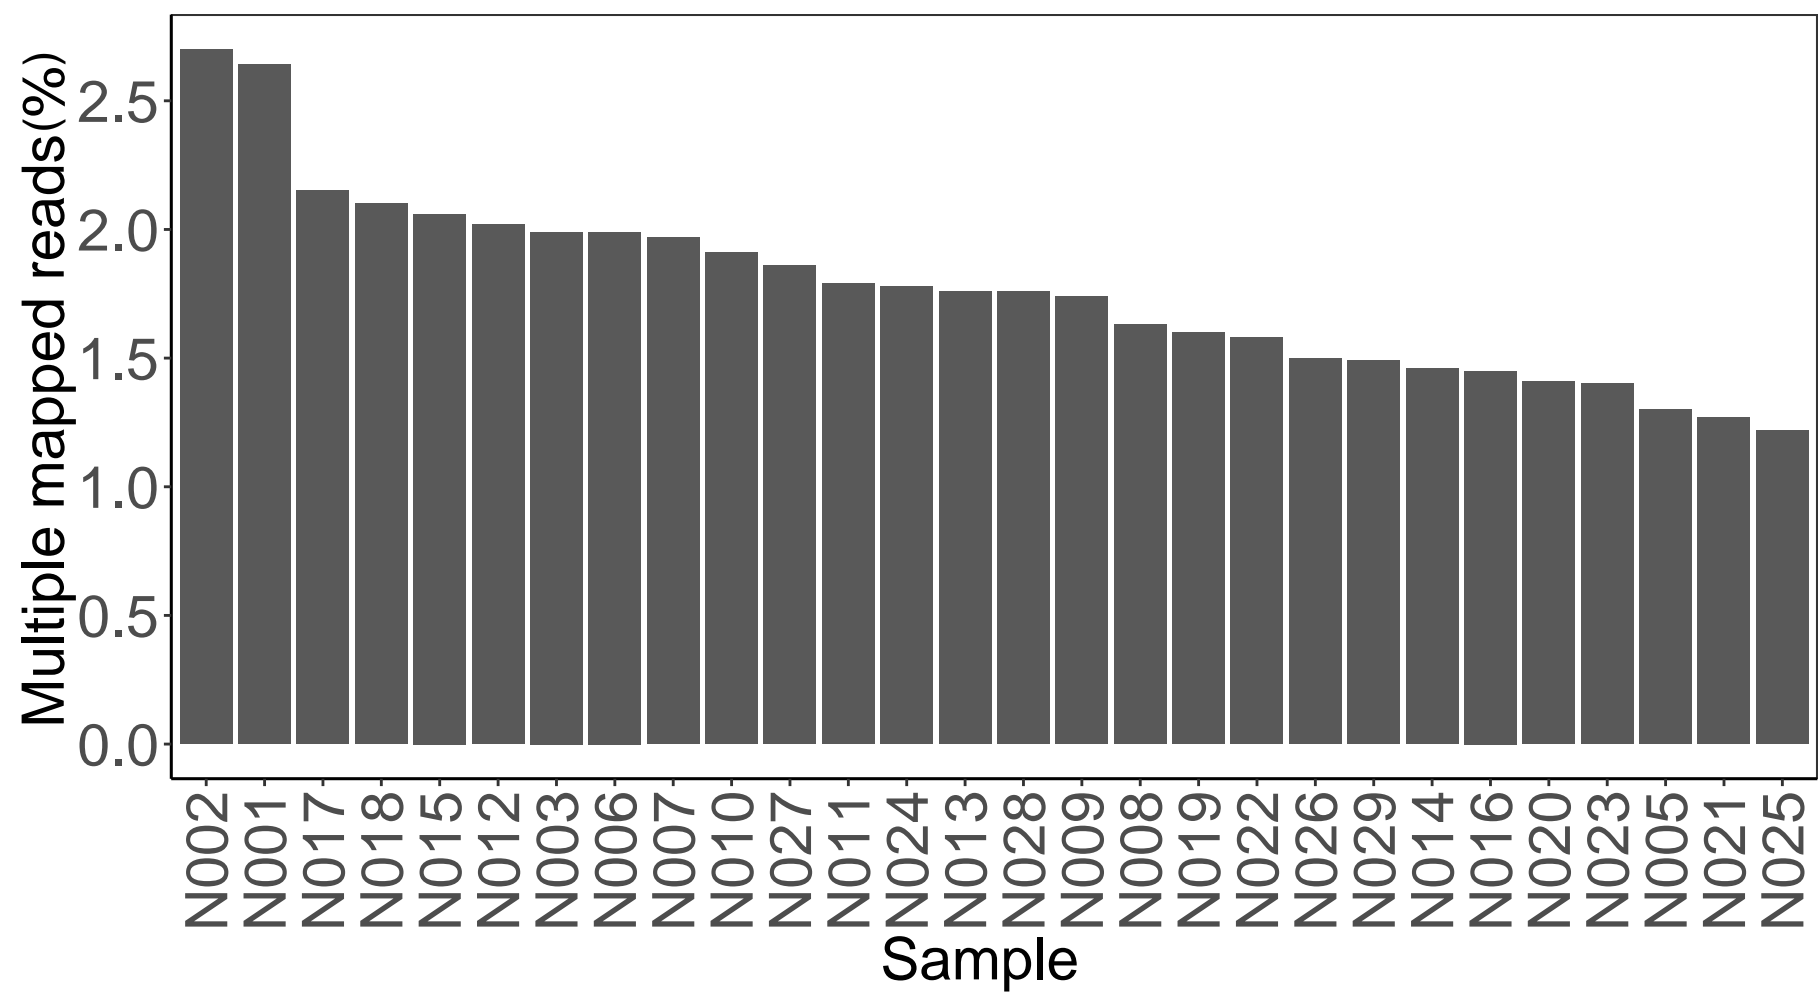

Supplement: Supp_fig_8.pdf [file Supp_fig_8.pdf]

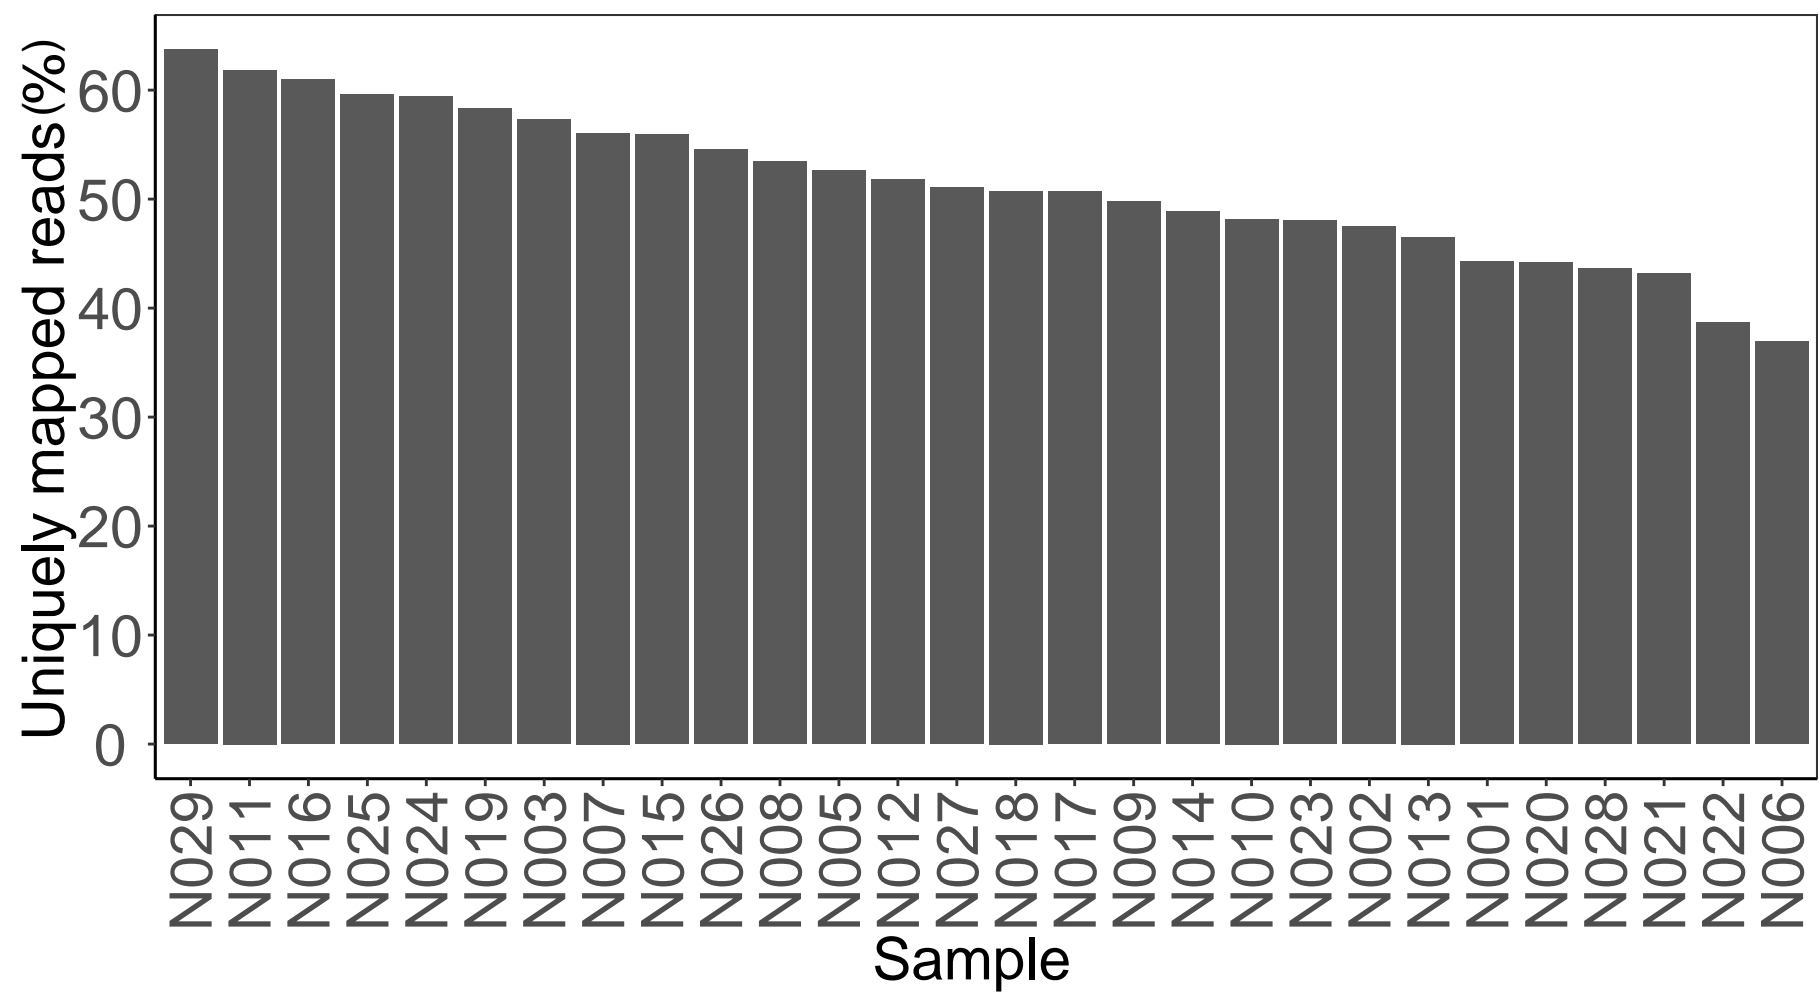

Supplement: Supp_fig_9.pdf [file Supp_fig_9.pdf]

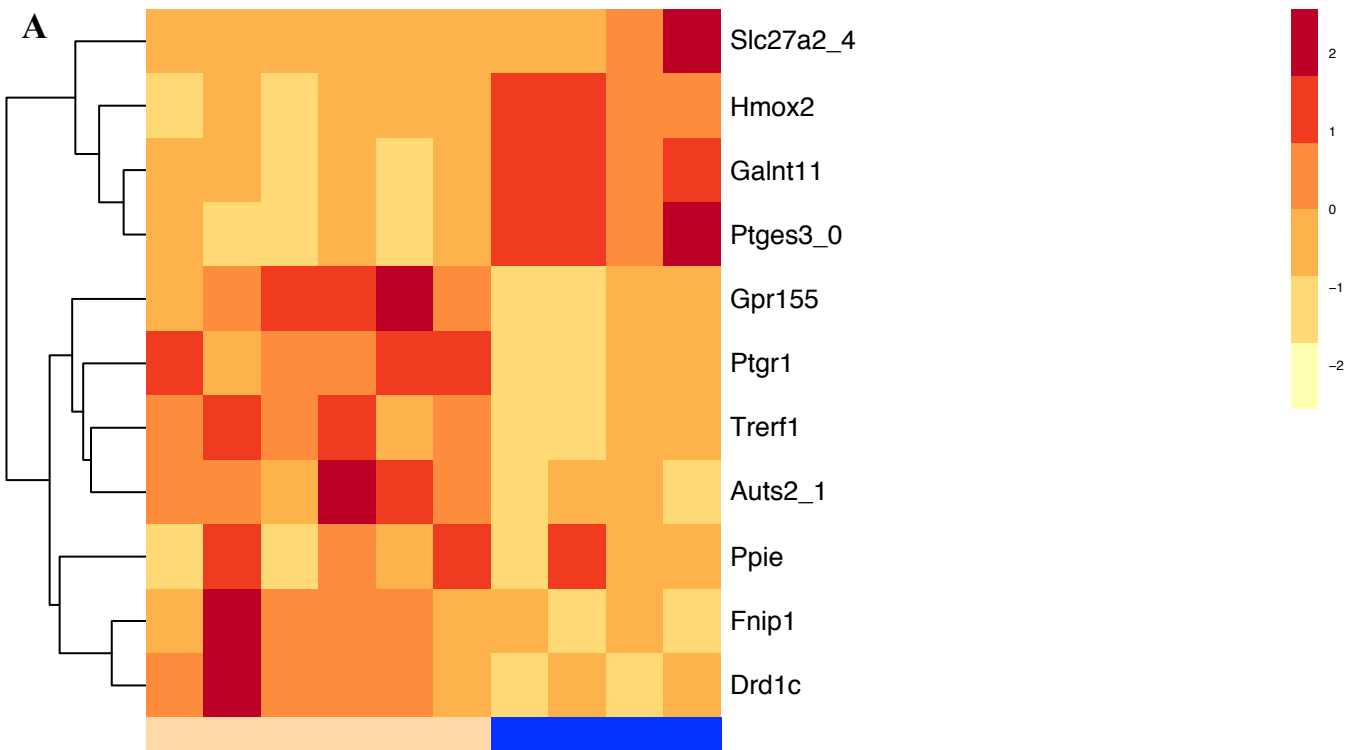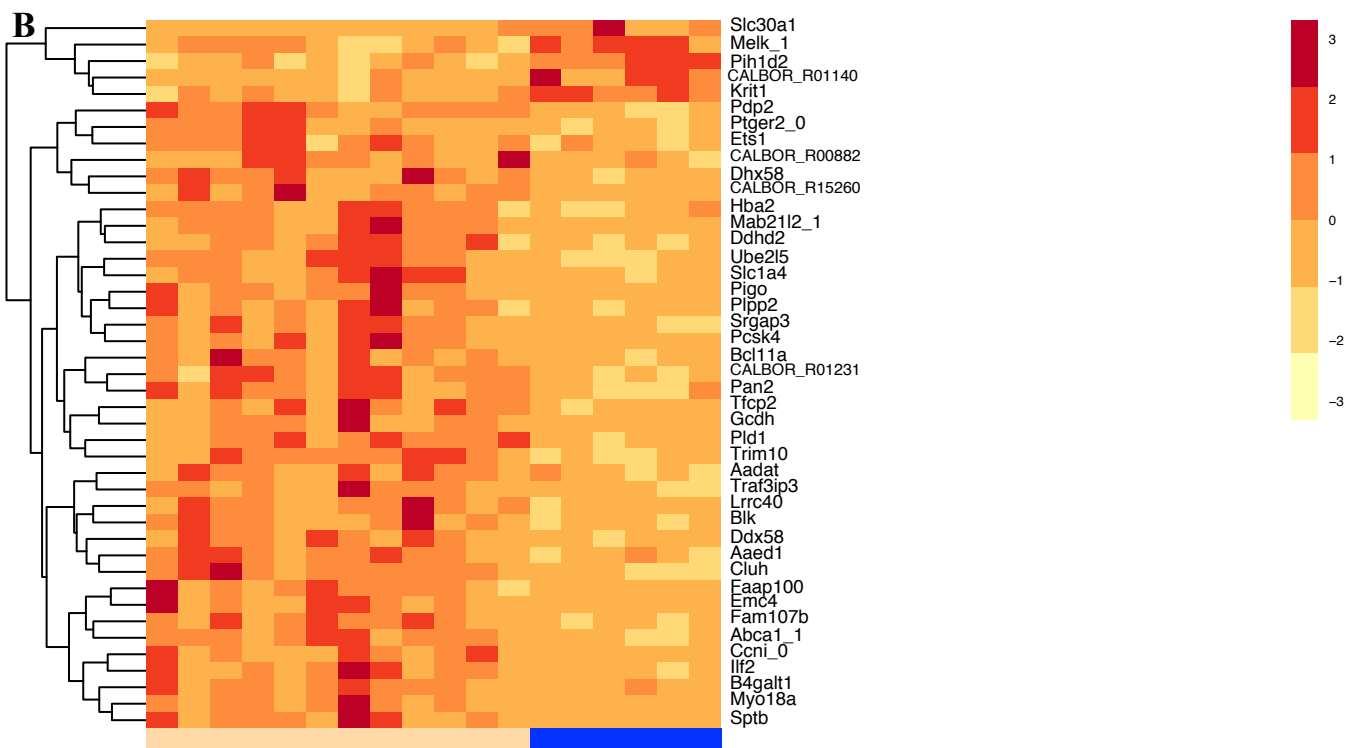

**Key:**  - No Plastic  - Plastic

Supplement: supp_fig_11_together.pdf [file supp_fig_11_together.pdf]

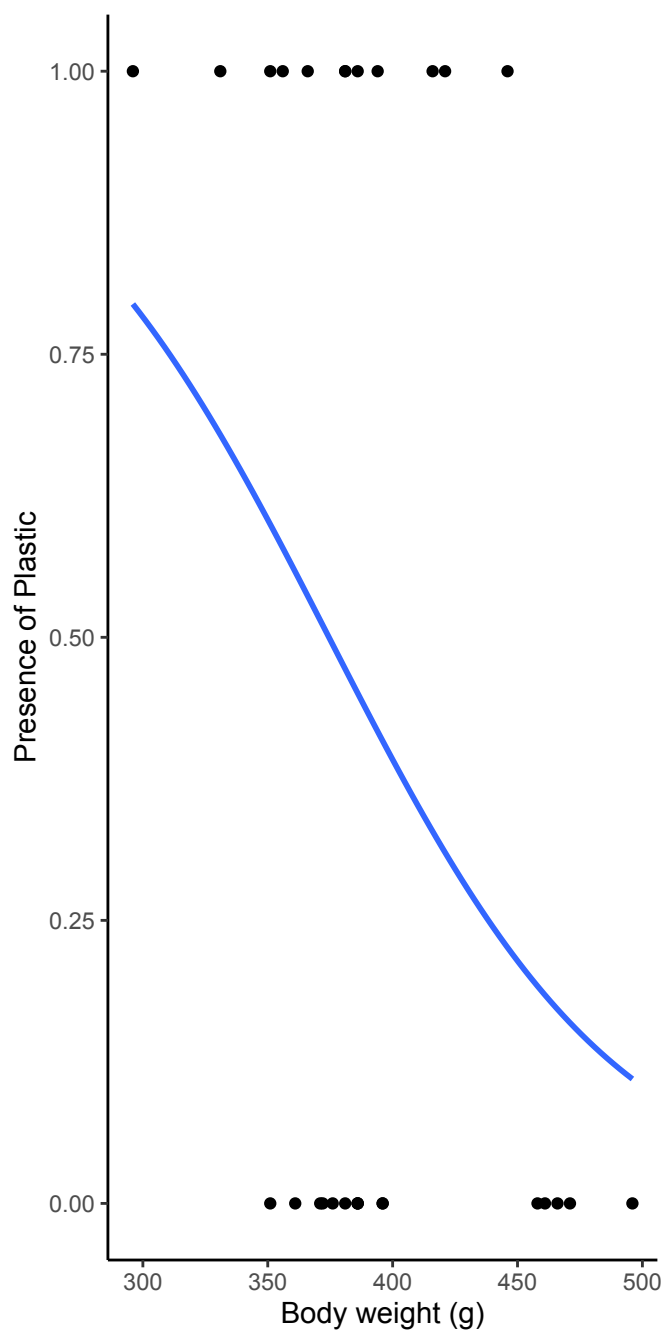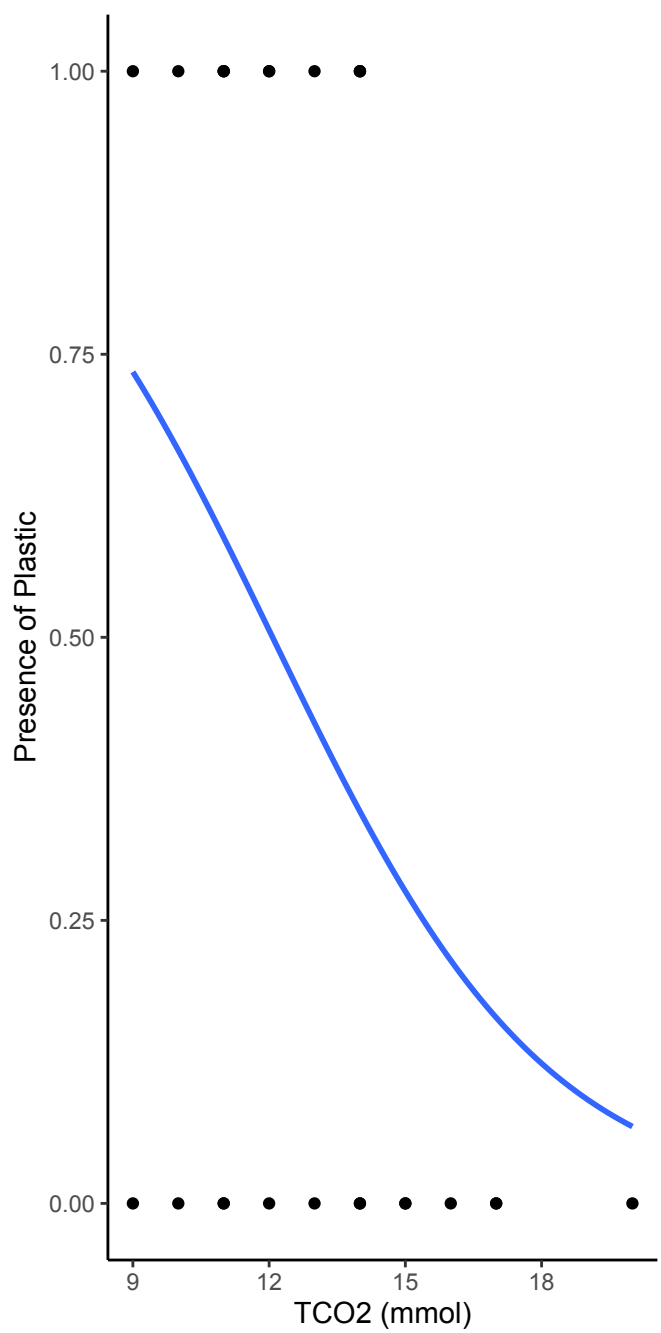

Supplement: supp_fig_3.pdf [file supp_fig_3.pdf]

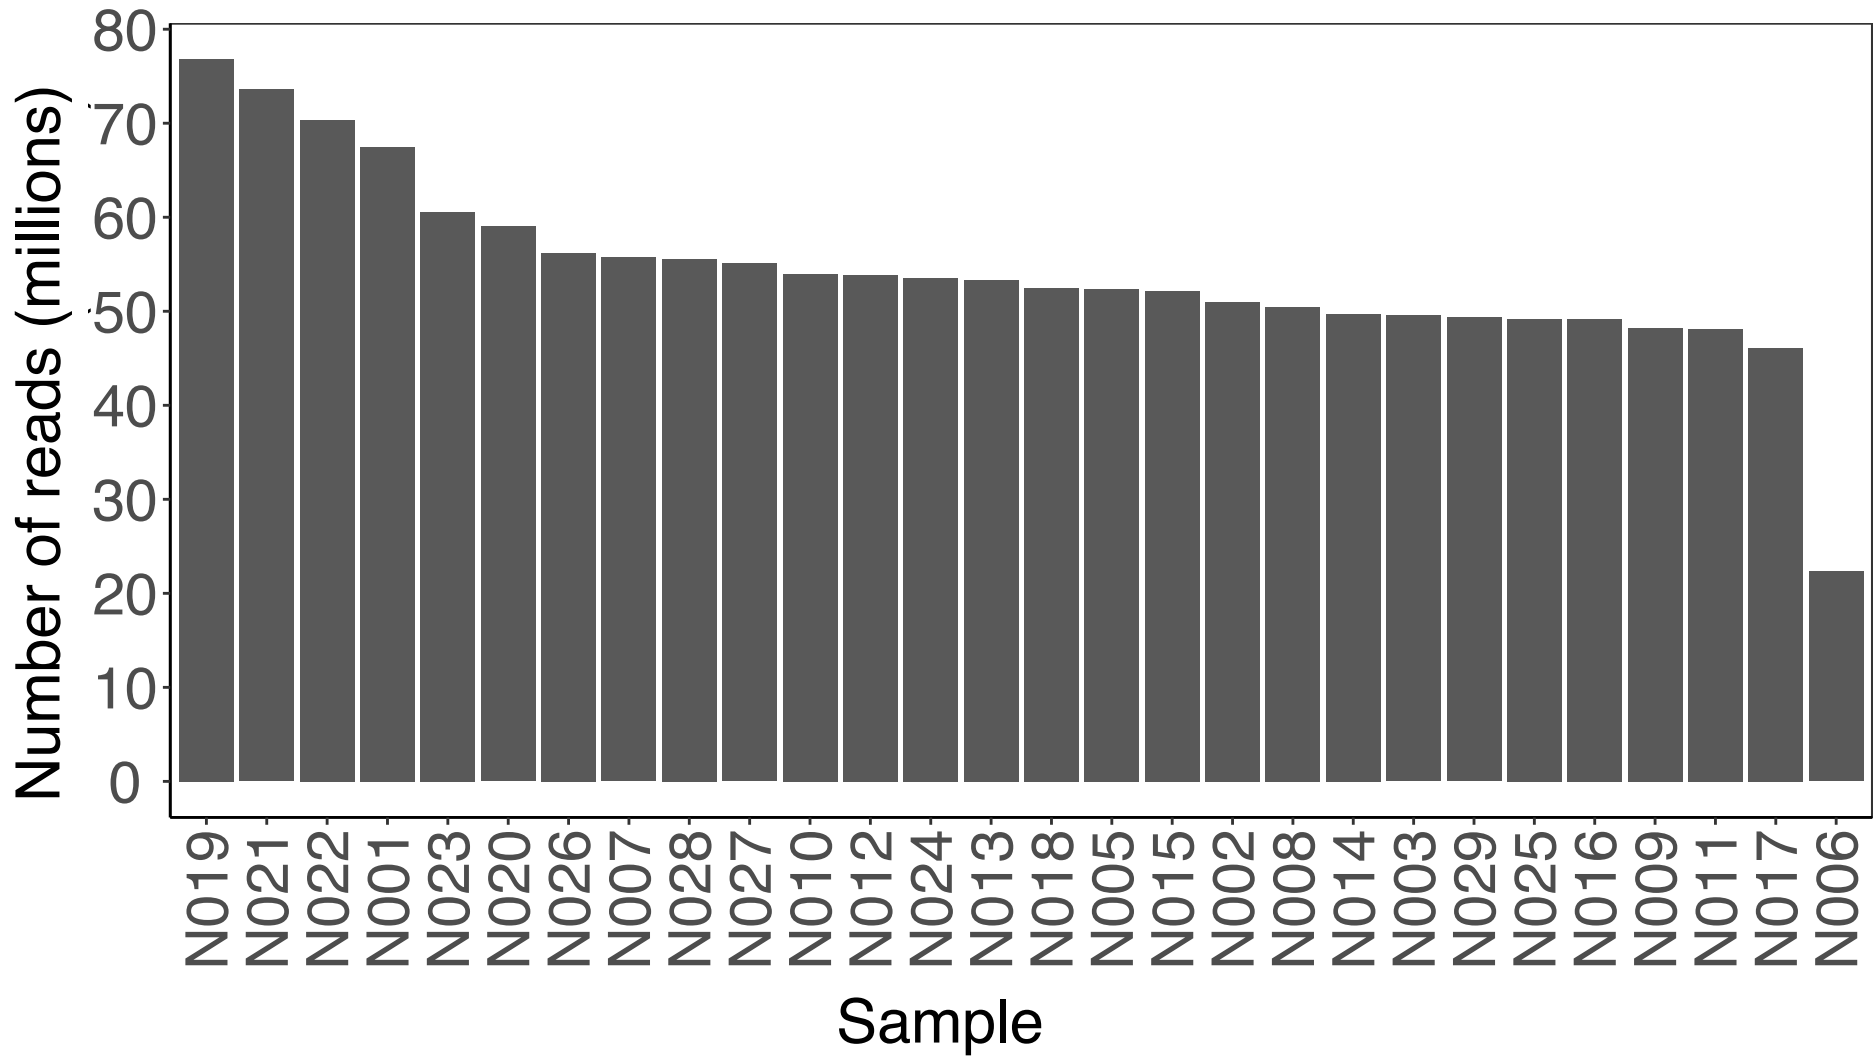

Supplement: supp_fig_7.pdf [file supp_fig_7.pdf]

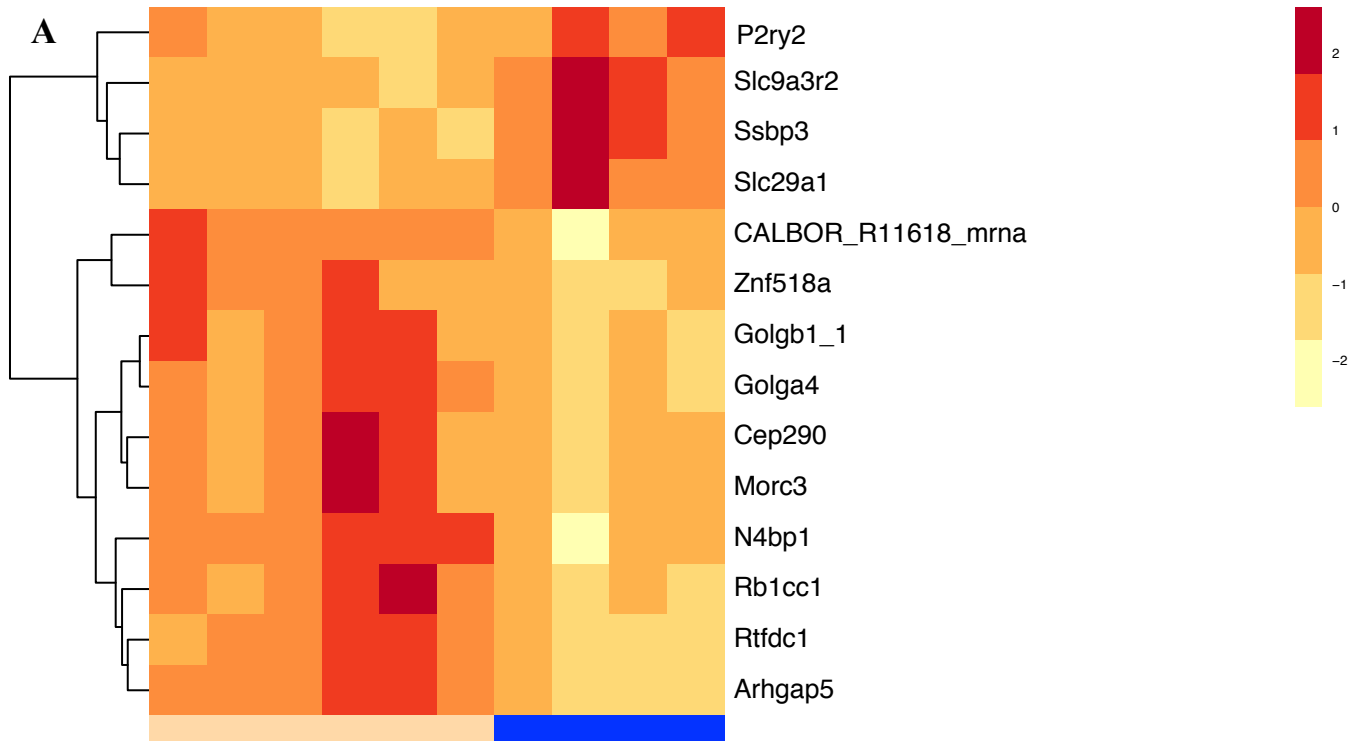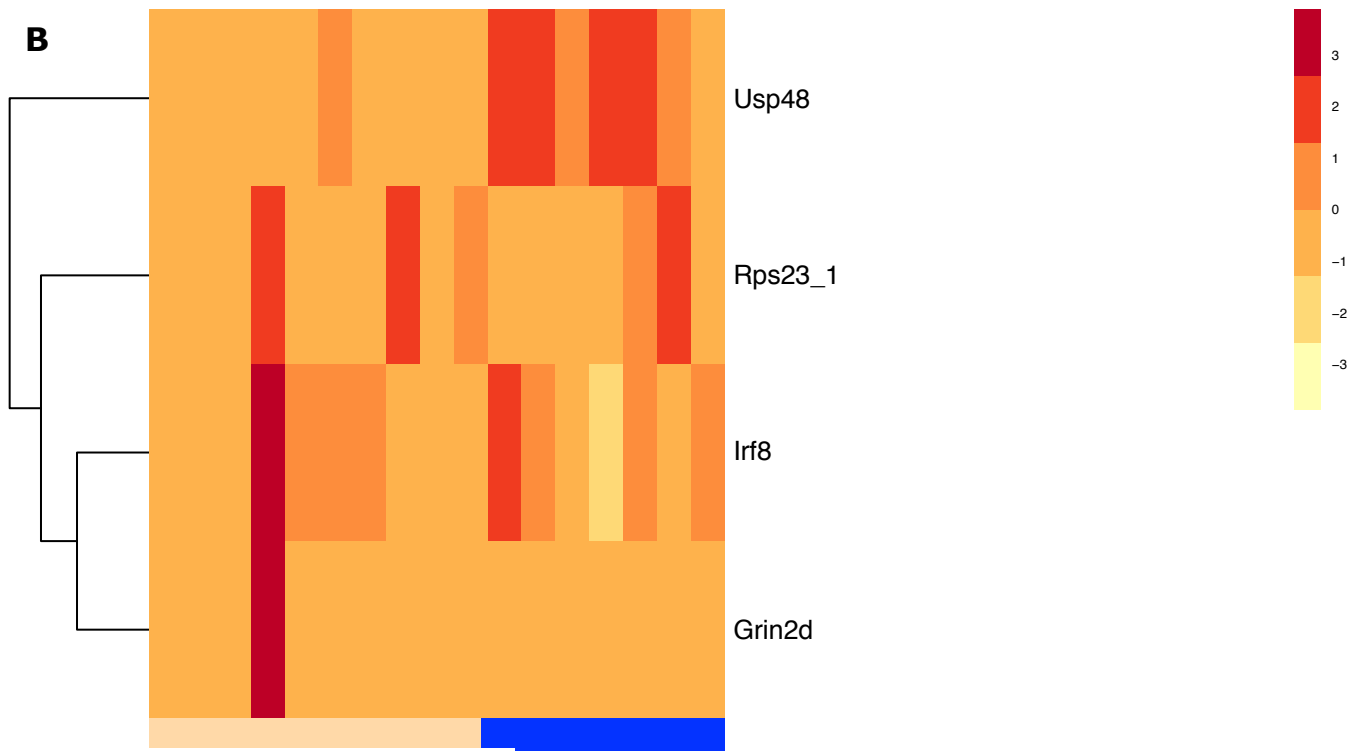

**Key:**  - No Plastic  - Plastic

Supplement: supp_figure_10together.pdf [file supp_figure_10together.pdf]

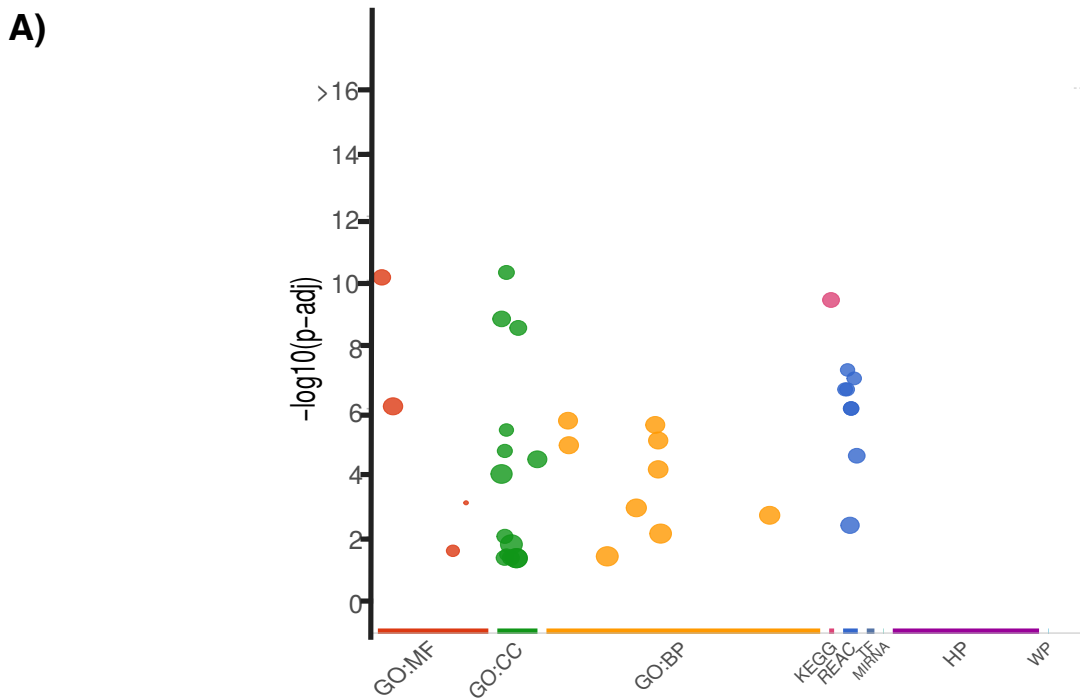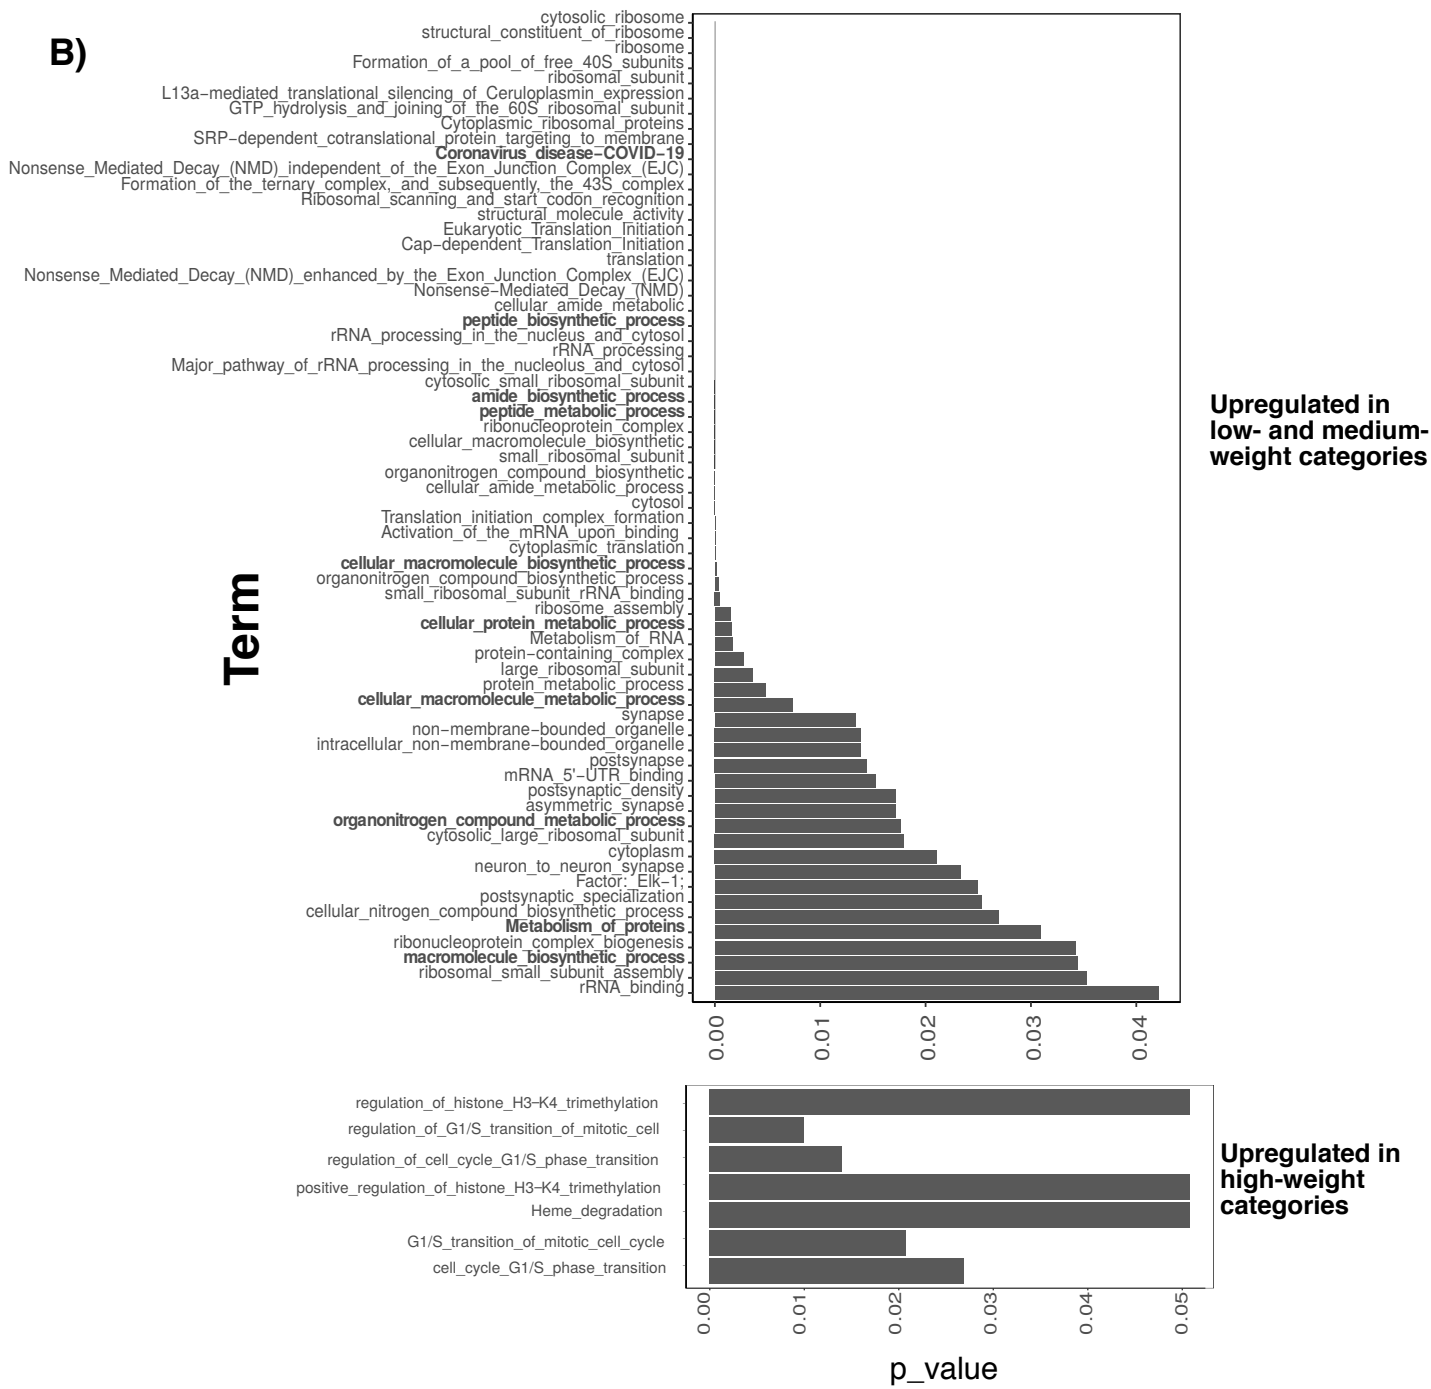

Supplement: supp_figure_12_redone.pdf [file supp_figure_12_redone.pdf]

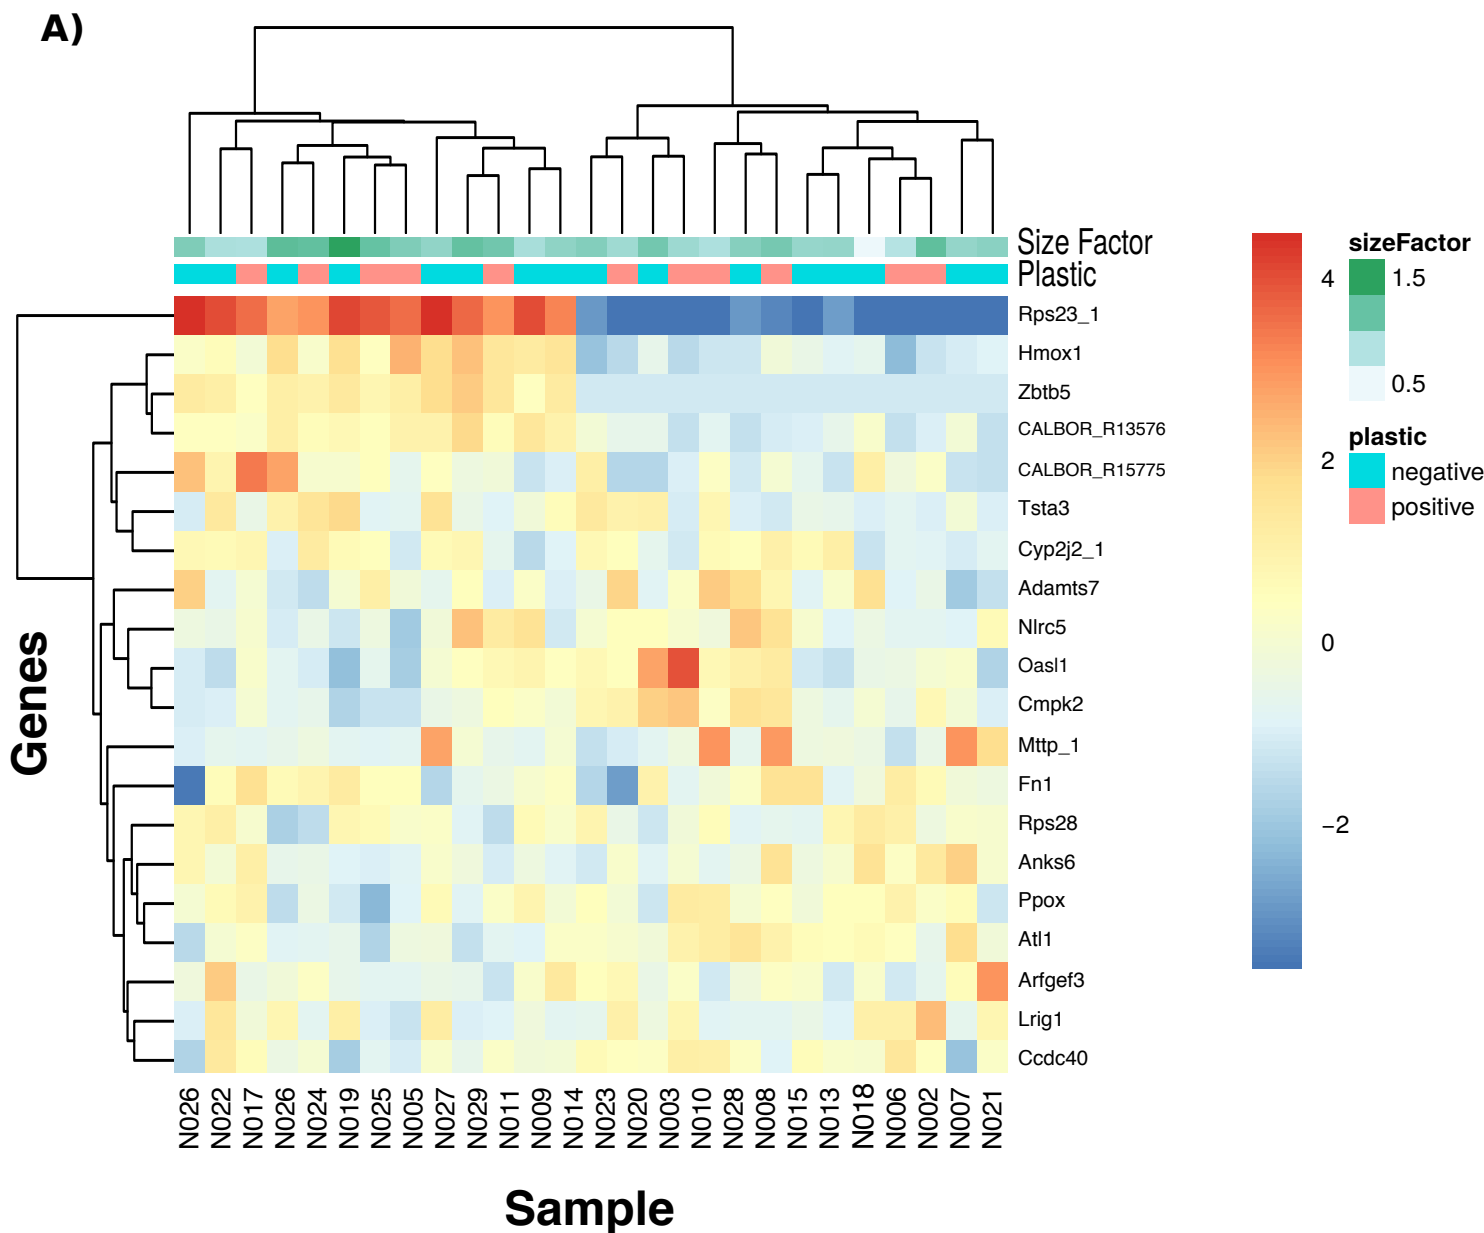

**B)**

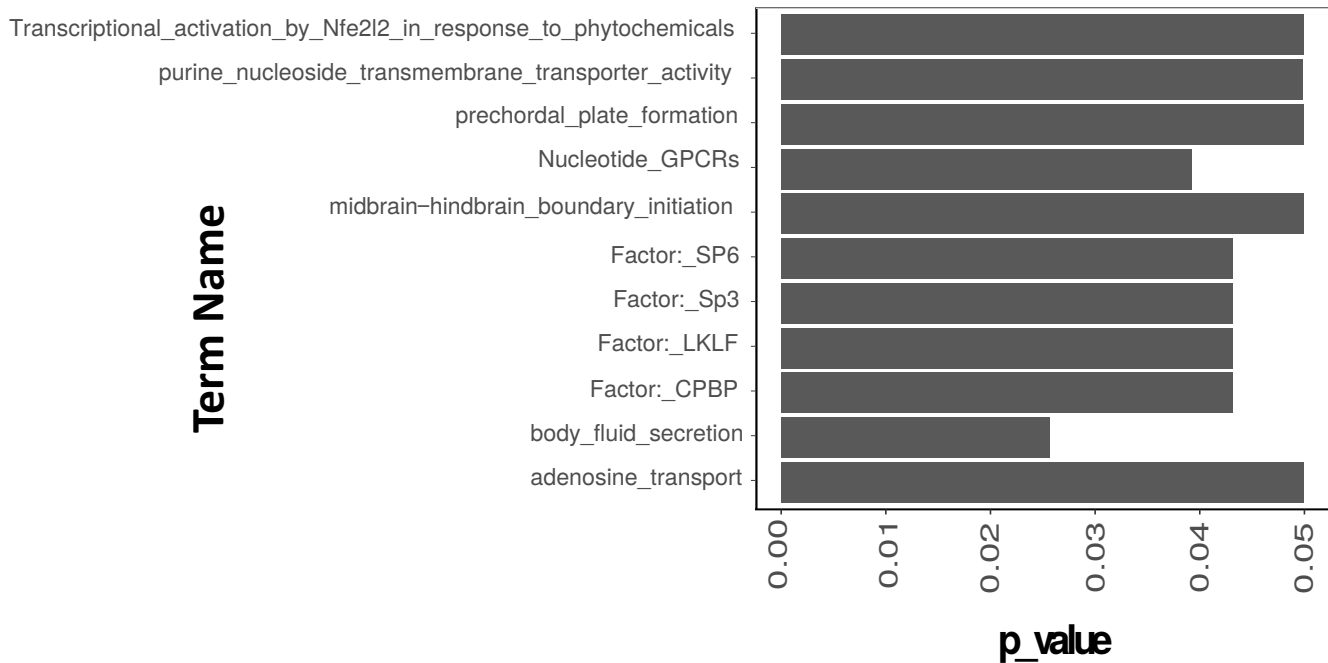

Supplement: supp_figure_13.pdf [file supp_figure_13.pdf]

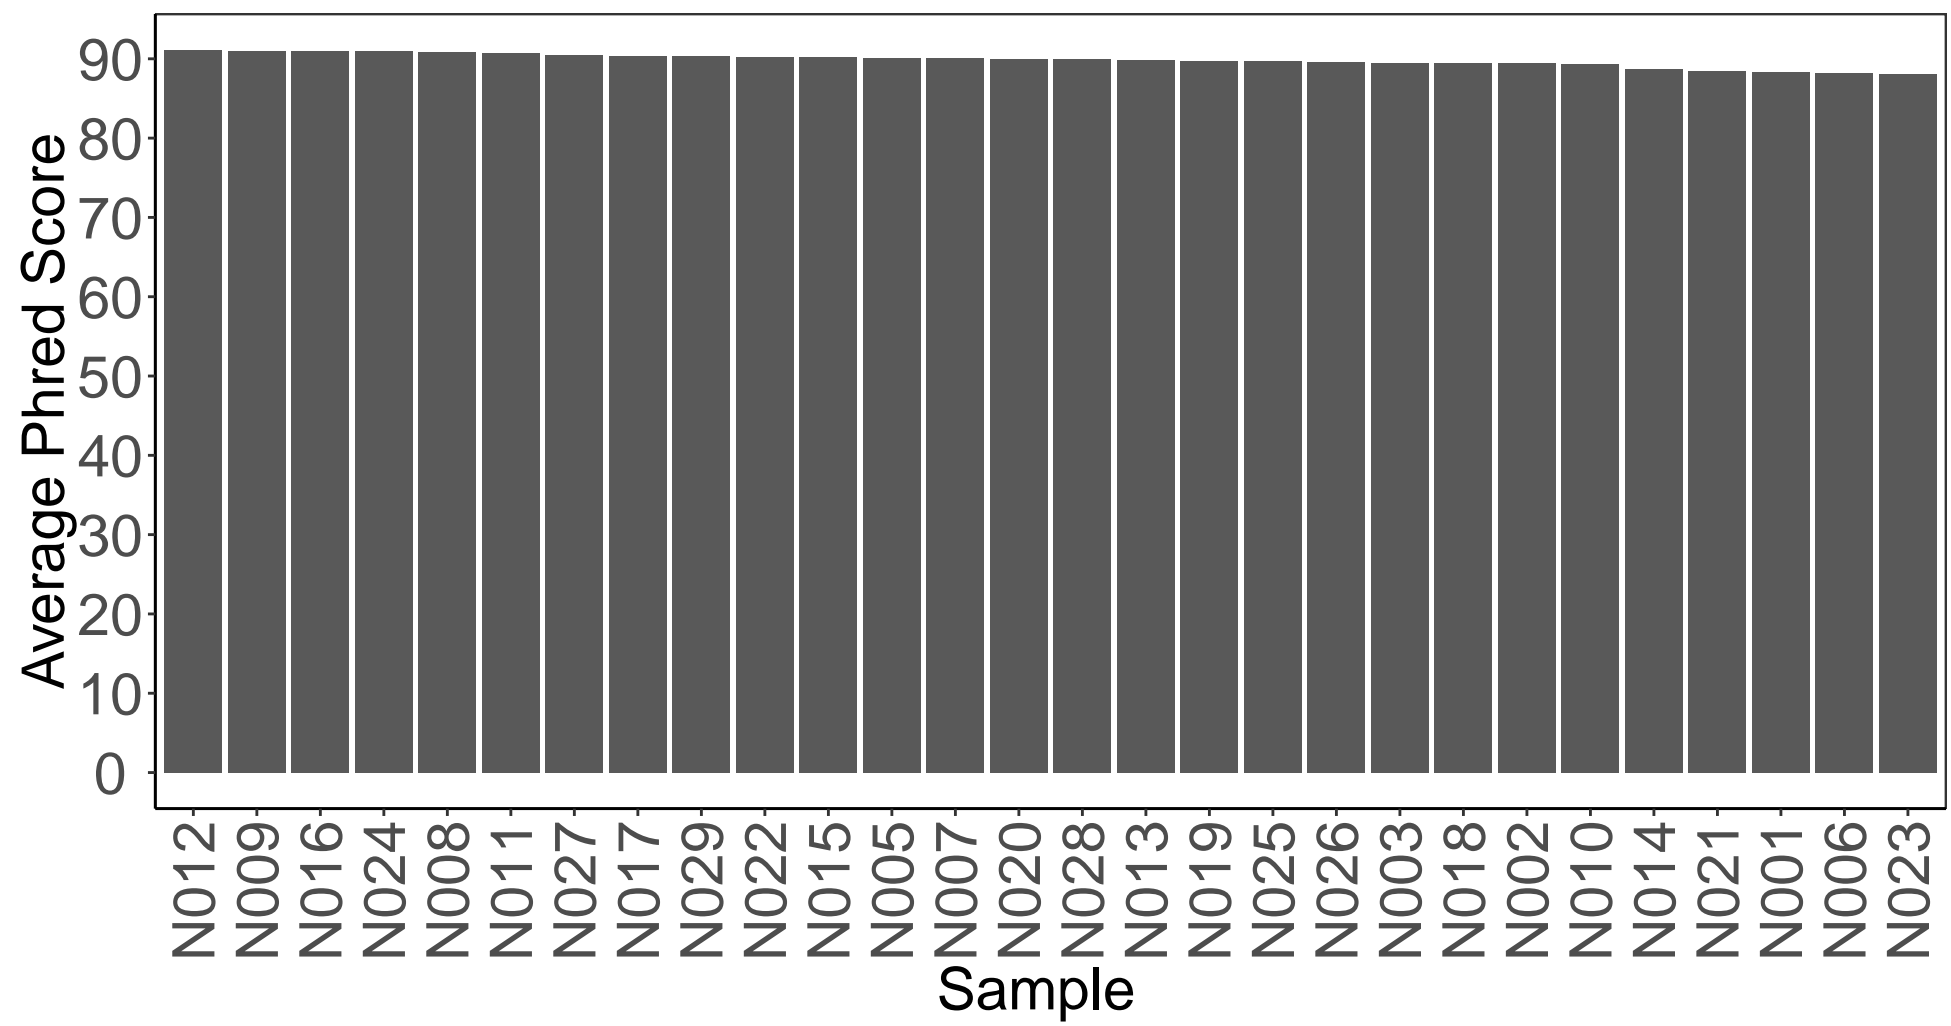

Supplement: supp_figure_6.pdf [file supp_figure_6.pdf]
